# Supplementary material for: Non-destructive distinction between geogenic and anthropogenic calcite by Raman spectroscopy combined with machine learning workflow
Source: Royal Society of Chemistry journal article supplement (doi:10.1039/d3an00441d), 2023-01-01
Supplement: d3an00441d1.pdf [file d3an00441d1.pdf]

## Electronic Supporting Information

Received 00th January 20xx,  
Accepted 00th January 20xx

DOI: 10.1039/x0xx00000x

# Non-destructive distinction between geogenic and anthropogenic calcite by Raman Spectroscopy combined with machine learning workflow

Sara Calandra,<sup>\*a b</sup> Claudia Conti,<sup>c</sup> Irene Centauro<sup>a</sup> and Emma Cantisani

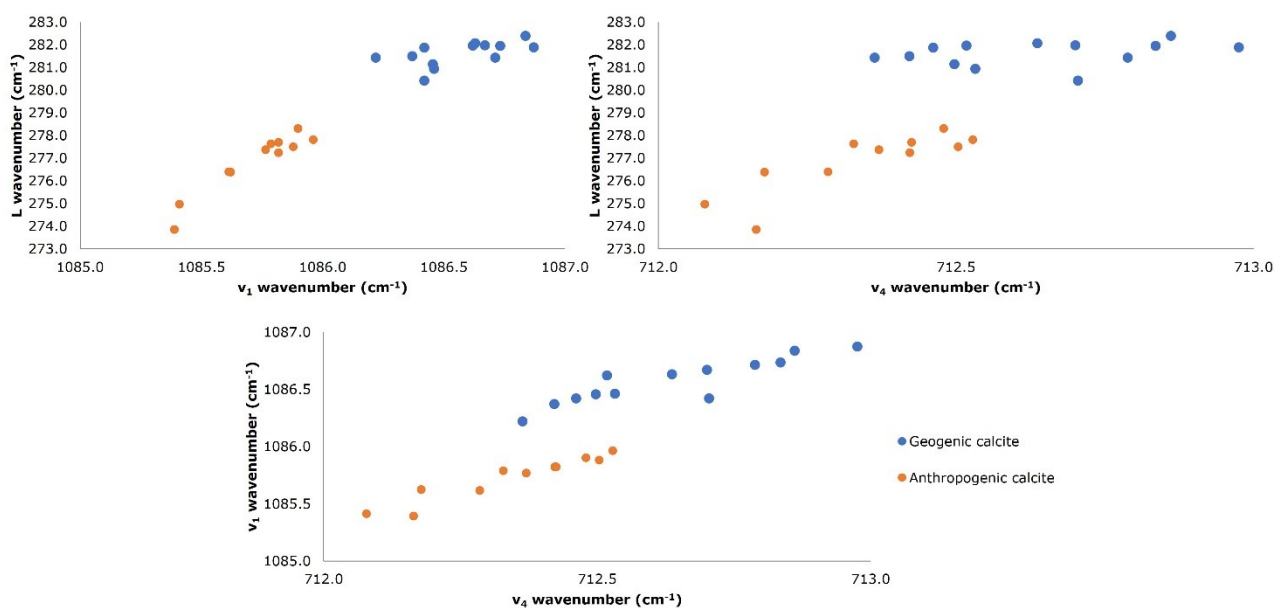

Fig. S1 2D plots of main discriminating parameters are reported, expressed as average values.

<sup>a</sup> Department of Chemistry Ugo Schiff, University of Florence, 50019 Sesto Fiorentino, Italy

<sup>b</sup> Department of Earth Sciences, University of Florence, 50121 Florence, Italy

<sup>c</sup> Institute of Heritage Science (ISPC), National Research Council (CNR), 20125 Milano, Italy.

<sup>d</sup> Institute of Heritage Science (ISPC), National Research Council (CNR), 50019 Sesto Fiorentino, Italy

\*Corresponding author.

Electronic Supplementary Information (ESI) available: [More details about data analysis, PDF]. See DOI: 10.1039/x0xx00000x

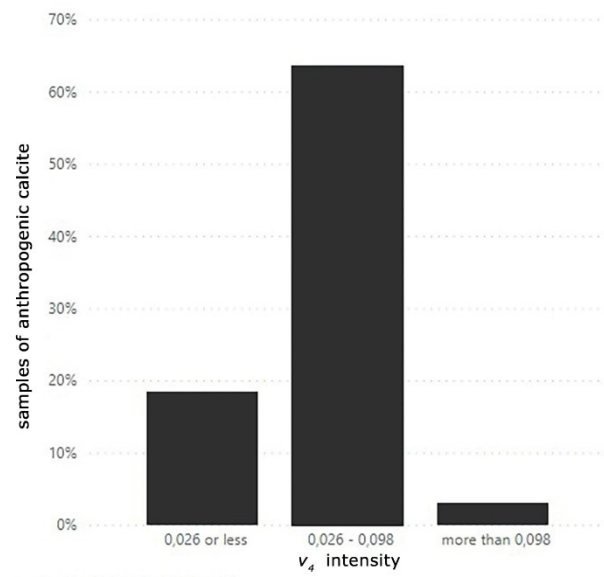

**Fig. S2** Scatterplot from Key Influence Factor visual: increase in % of anthropogenic calcite samples of  $v_4$  intensity values between 0.026 and 0.098.
